# Supplementary material for: Retinal Parameters as Compared with Head Circumference, Height, Weight, and Body Mass Index in Children in Kenya and Bhutan
Source: PubMed Central journal article supplement (PMC6090321; doi:10.4269/ajtmh.17-0943), 2018-06-11
Supplement: tpmd170943.SD1.pdf [file tpmd170943.SD1.pdf]

SUPPLEMENTAL APPENDIX 1

OPTICAL PARAMETERS FOR BRAIN DEVELOPMENT PARTICIPANT SURVEY

Participant code: \_\_\_\_\_  
Date: \_\_\_\_\_  
**Guardian (parent, next of kin etc)**  
Name: \_\_\_\_\_  
Relationship to child: Parent/guardian specify: \_\_\_\_\_  
Languages: \_\_\_\_\_  
Phone number: \_\_\_\_\_  
Address: \_\_\_\_\_  
\_\_\_\_\_

**Child**

Name: \_\_\_\_\_  
Age (years, months): \_\_\_\_\_ Date of birth: \_\_\_\_\_  
Gender: Male Female.  
Languages: \_\_\_\_\_  
Participant code: \_\_\_\_\_

**Characteristics**

**Years of school completed:** No school 0–6 months 6–12 months 1–2 years 2 years+

**HIV status:** Known positive Nonreactive Unknown.

**Did the participant's mother have any medical problems during pregnancy (preeclampsia, gestational diabetes, bleeding, and early contractions):** Yes No Unknown

*If yes, describe:*

**Was the participant's mother hospitalized before or after the pregnancy?**

Yes No Unknown.

*If yes, what was she hospitalized for:*

**Does the child have any other medical conditions (If none, write none. If unknown, write UNK):?**

**Anthropometric measurements**

**Height (cm): Weight (kg): Head circumference (cm):**

**Comments:**

SUPPLEMENTAL APPENDIX 2

**Kenya**

Current or previous malaria n = 12

Itchy/watery/red eyes n = 7

Persistent cough n = 4

Three or fewer children reported the following conditions:

Ear infection/pain

Stomach pains

Asthma

Jigger (*Tunga penetrans*) infection

Sores

Sickle cell anemia

Previous sepsis

Headaches

Diarrhea

Scabies

Renal incontinence

Rash

Anal warts

Vocal cord issue

Chest pain

Nose bleeds

Opportunistic infections

**Bhutan**

Three or fewer children reported the following conditions:

Headaches/migraine

Previous pneumonia

Previous meningitis

Kidney stones

Ear pain

Leg pain

Dental caries

SUPPLEMENTAL TABLE 1  
Retinal parameters

|     |                             | Age, years                  |                  |                  |                  |                  |                  |                  |                  |                 |                  |                  | Total |
|-----|-----------------------------|-----------------------------|------------------|------------------|------------------|------------------|------------------|------------------|------------------|-----------------|------------------|------------------|-------|
|     |                             | 3                           | 4                | 5                | 6                | 7                | 8                | 9                | 10               | 11              | Total            |                  |       |
| All | OD                          | Average RNFL, $\mu\text{m}$ | NA               | 109.7 $\pm$ 11.9 | 108.3 $\pm$ 13.0 | 107.1 $\pm$ 8.3  | 108.5 $\pm$ 10.7 | 109.2 $\pm$ 10.9 | 107.1 $\pm$ 7.8  | 111.6 $\pm$ 7.3 | 110 (N = 1)      | 108.3 $\pm$ 10.0 |       |
|     |                             | Superior                    | NA               | 113.4 $\pm$ 14.5 | 109.6 $\pm$ 15.5 | 108.2 $\pm$ 10.4 | 110.1 $\pm$ 12.8 | 110.0 $\pm$ 12.7 | 111.1 $\pm$ 6.5  | 114.6 $\pm$ 6.5 | 111 (N = 1)      | 109.8 $\pm$ 11.9 |       |
|     |                             | Inferior                    | NA               | 106.6 $\pm$ 11.2 | 107.2 $\pm$ 12.7 | 106.2 $\pm$ 8.5  | 107.3 $\pm$ 10.3 | 108.2 $\pm$ 11.1 | 103.1 $\pm$ 10.9 | 109.2 $\pm$ 8.8 | 109 (N = 1)      | 106.9 $\pm$ 10.1 |       |
|     | OS                          | Nasal                       | NA               | 89.3 $\pm$ 13.9  | 86.6 $\pm$ 14.3  | 84.3 $\pm$ 13.8  | 87.3 $\pm$ 17.7  | 85.3 $\pm$ 20.3  | 80.5 $\pm$ 9.7   | 96.4 $\pm$ 17.4 | 86 (N = 1)       | 85.9 $\pm$ 16.1  |       |
|     |                             | Temporal                    | NA               | 71.3 $\pm$ 8.2   | 79.6 $\pm$ 9.1   | 80.1 $\pm$ 11.0  | 77.7 $\pm$ 13.0  | 84.1 $\pm$ 18.3  | 85.2 $\pm$ 10.5  | 74.0 $\pm$ 7.8  | 84 (N = 1)       | 79.8 $\pm$ 13.0  |       |
|     |                             | Average GCC, $\mu\text{m}$  | 92.0 $\pm$ 6.6   | 98.3 $\pm$ 6.4   | 95.8 $\pm$ 8.4   | 98.3 $\pm$ 5.8   | 98.8 $\pm$ 6.3   | 97.7 $\pm$ 5.8   | 97.2 $\pm$ 5.7   | 100 $\pm$ 3.9   | 97 (N = 1)       | 98.0 $\pm$ 6.4   |       |
|     | OS                          | Superior                    | 94.0 $\pm$ 6.2   | 97.8 $\pm$ 6.6   | 95.1 $\pm$ 8.6   | 97.4 $\pm$ 6.0   | 98.6 $\pm$ 6.8   | 97.7 $\pm$ 5.9   | 98.8 $\pm$ 5.5   | 99.3 $\pm$ 3.6  | 96 (N = 1)       | 97.3 $\pm$ 6.6   |       |
|     |                             | Inferior                    | 89.3 $\pm$ 6.5   | 99.0 $\pm$ 6.7   | 96.0 $\pm$ 8.6   | 98.5 $\pm$ 6.8   | 99.7 $\pm$ 5.9   | 99.4 $\pm$ 6.0   | 98.9 $\pm$ 6.1   | 100.8 $\pm$ 5.1 | 99 (N = 1)       | 98.5 $\pm$ 6.9   |       |
|     |                             | Average RNFL, $\mu\text{m}$ | 114 (N = 1)      | 104.3 $\pm$ 9.3  | 109.2 $\pm$ 9.7  | 107.3 $\pm$ 10.9 | 110.2 $\pm$ 10.5 | 108.7 $\pm$ 9.6  | 106.3 $\pm$ 8.4  | 110.8 $\pm$ 5.0 | 112 (N = 1)      | 108.6 $\pm$ 10.0 |       |
|     | OS                          | Superior                    | 114 (N = 1)      | 106.5 $\pm$ 9.7  | 112.8 $\pm$ 10.8 | 110.1 $\pm$ 10.6 | 113.1 $\pm$ 11.4 | 111.2 $\pm$ 8.3  | 108.6 $\pm$ 10.6 | 115.8 $\pm$ 7.0 | 119 (N = 1)      | 111.5 $\pm$ 11.6 |       |
|     |                             | Inferior                    | 115 (N = 1)      | 101.8 $\pm$ 9.7  | 106.2 $\pm$ 10.8 | 104.7 $\pm$ 10.6 | 107.0 $\pm$ 11.4 | 106.2 $\pm$ 8.3  | 103.9 $\pm$ 10.6 | 106.4 $\pm$ 7.0 | 106 (N = 1)      | 105.7 $\pm$ 10.2 |       |
|     |                             | Nasal                       | 70 (N = 1)       | 77.5 $\pm$ 9.8   | 86.3 $\pm$ 19.8  | 83.5 $\pm$ 11.5  | 87.4 $\pm$ 14.5  | 84.1 $\pm$ 15.0  | 80.6 $\pm$ 9.2   | 84.4 $\pm$ 12.7 | 82 (N = 1)       | 84.5 $\pm$ 14.0  |       |
|     | OS                          | Temporal                    | 79 (N = 1)       | 74.3 $\pm$ 9.3   | 74.9 $\pm$ 15.7  | 78.2 $\pm$ 9.7   | 75.2 $\pm$ 8.0   | 76.6 $\pm$ 11.2  | 77.1 $\pm$ 9.5   | 79.6 $\pm$ 2.8  | 84 (N = 1)       | 76.6 $\pm$ 10.2  |       |
|     |                             | Average GCC, $\mu\text{m}$  | 90.0 $\pm$ 4.2   | 97.5 $\pm$ 5.1   | 97.7 $\pm$ 5.9   | 98.6 $\pm$ 6.0   | 99.3 $\pm$ 5.9   | 98.5 $\pm$ 6.1   | 97.4 $\pm$ 7.4   | 101.0 $\pm$ 4.2 | 96 (N = 1)       | 98.4 $\pm$ 6.0   |       |
|     |                             | Superior                    | 89.0 $\pm$ 6.4   | 97.1 $\pm$ 5.4   | 98.1 $\pm$ 6.2   | 98.9 $\pm$ 5.9   | 99.0 $\pm$ 5.4   | 98.8 $\pm$ 6.1   | 97.1 $\pm$ 8.0   | 101.3 $\pm$ 4.2 | 99 (N = 1)       | 98.5 $\pm$ 6.3   |       |
| OS  | Inferior                    | 90.5 $\pm$ 6.4              | 97.5 $\pm$ 5.4   | 97.5 $\pm$ 6.2   | 98.4 $\pm$ 5.9   | 99.2 $\pm$ 5.4   | 98.1 $\pm$ 6.1   | 97.4 $\pm$ 8.0   | 101.0 $\pm$ 4.2  | 99 (N = 1)      | 98.2 $\pm$ 6.0   |                  |       |
|     | Average RNFL, $\mu\text{m}$ | NA                          | 115.0 $\pm$ 9.9  | 107.6 $\pm$ 18.9 | 108.1 $\pm$ 8.9  | 110.1 $\pm$ 13.0 | 107.5 $\pm$ 12.2 | 106.0 $\pm$ 6.4  | 111.0 $\pm$ 9.2  | NA              | 108.6 $\pm$ 11.5 |                  |       |
|     | Superior                    | NA                          | 124.0 $\pm$ 12.7 | 102.4 $\pm$ 22.5 | 109.6 $\pm$ 12.4 | 113.6 $\pm$ 16.4 | 108.8 $\pm$ 14.4 | 111.0 $\pm$ 6.7  | 115.7 $\pm$ 7.5  | NA              | 110.6 $\pm$ 14.5 |                  |       |
| OS  | Inferior                    | NA                          | 106.0 $\pm$ 7.1  | 112.8 $\pm$ 16.9 | 106.9 $\pm$ 9.8  | 108.0 $\pm$ 11.9 | 106.1 $\pm$ 11.8 | 101.0 $\pm$ 7.6  | 107.3 $\pm$ 11.5 | NA              | 106.9 $\pm$ 11.2 |                  |       |
|     | Nasal                       | NA                          | 102.5 $\pm$ 16.3 | 83.0 $\pm$ 8.2   | 78.8 $\pm$ 10.8  | 88.7 $\pm$ 20.4  | 80.5 $\pm$ 12.9  | 76.8 $\pm$ 7.9   | 98.7 $\pm$ 19.8  | NA              | 83.8 $\pm$ 15.2  |                  |       |
|     | Temporal                    | NA                          | 65.5 $\pm$ 12.0  | 81.6 $\pm$ 9.5   | 82.8 $\pm$ 13.7  | 75.5 $\pm$ 14.3  | 83.2 $\pm$ 12.9  | 85.3 $\pm$ 9.6   | 73.0 $\pm$ 8.7   | NA              | 79.8 $\pm$ 12.9  |                  |       |
| OS  | Average GCC, $\mu\text{m}$  | 92.0 $\pm$ 6.6              | 96.4 $\pm$ 6.0   | 95.0 $\pm$ 9.6   | 97.5 $\pm$ 4.5   | 96.8 $\pm$ 5.3   | 98.4 $\pm$ 5.8   | 96.3 $\pm$ 5.7   | 98.7 $\pm$ 3.5   | NA              | 96.7 $\pm$ 6.5   |                  |       |
|     | Superior                    | 94.0 $\pm$ 6.2              | 95.9 $\pm$ 6.5   | 94.5 $\pm$ 9.4   | 97.4 $\pm$ 5.6   | 96.4 $\pm$ 5.3   | 98.5 $\pm$ 6.4   | 96.1 $\pm$ 5.9   | 98.3 $\pm$ 3.8   | NA              | 96.5 $\pm$ 6.7   |                  |       |
|     | Inferior                    | 89.3 $\pm$ 6.5              | 95.8 $\pm$ 6.4   | 94.9 $\pm$ 9.5   | 96.3 $\pm$ 4.9   | 97.5 $\pm$ 5.4   | 98.3 $\pm$ 5.5   | 98.2 $\pm$ 5.4   | 99.0 $\pm$ 4.6   | NA              | 96.5 $\pm$ 6.6   |                  |       |
| OS  | Average RNFL, $\mu\text{m}$ | 114 (N = 1)                 | NA               | 113.3 $\pm$ 8.8  | 110.4 $\pm$ 10.7 | 110.5 $\pm$ 9.7  | 105.9 $\pm$ 9.3  | 104.0 $\pm$ 7.6  | 108.7 $\pm$ 5.7  | NA              | 108.8 $\pm$ 9.2  |                  |       |
|     | Superior                    | 114 (N = 1)                 | NA               | 116.6 $\pm$ 6.7  | 113.5 $\pm$ 7.0  | 115.4 $\pm$ 12.4 | 105.4 $\pm$ 8.8  | 105.4 $\pm$ 8.8  | 114.0 $\pm$ 8.3  | NA              | 111.7 $\pm$ 12.1 |                  |       |
|     | Inferior                    | 115 (N = 1)                 | NA               | 111.4 $\pm$ 6.7  | 107.5 $\pm$ 7.0  | 105.2 $\pm$ 12.4 | 104.5 $\pm$ 8.4  | 102.6 $\pm$ 8.8  | 103.7 $\pm$ 9.0  | NA              | 106.1 $\pm$ 9.0  |                  |       |
| OS  | Nasal                       | 70 (N = 1)                  | NA               | 95.7 $\pm$ 22.6  | 82.4 $\pm$ 12.9  | 81.4 $\pm$ 10.7  | 82.3 $\pm$ 18.0  | 76.8 $\pm$ 5.0   | 82.7 $\pm$ 9.3   | NA              | 83.0 $\pm$ 15.3  |                  |       |
|     | Temporal                    | 79 (N = 1)                  | NA               | 73.0 $\pm$ 15.7  | 75.6 $\pm$ 14.5  | 74.4 $\pm$ 9.1   | 75.7 $\pm$ 9.7   | 77.6 $\pm$ 10.5  | 79.7 $\pm$ 3.1   | NA              | 75.6 $\pm$ 10.9  |                  |       |
|     | Average GCC, $\mu\text{m}$  | 90.0 $\pm$ 4.2              | 96.8 $\pm$ 4.4   | 96.8 $\pm$ 5.6   | 96.8 $\pm$ 5.7   | 97.7 $\pm$ 4.5   | 98.3 $\pm$ 0.3   | 94.7 $\pm$ 5.2   | 100.3 $\pm$ 4.9  | NA              | 97.1 $\pm$ 5.3   |                  |       |
| OS  | Superior                    | 89.0 $\pm$ 6.4              | 96.5 $\pm$ 4.7   | 97.0 $\pm$ 6.1   | 96.9 $\pm$ 5.2   | 97.8 $\pm$ 4.6   | 98.7 $\pm$ 5.4   | 94.6 $\pm$ 5.9   | 100.7 $\pm$ 4.9  | NA              | 97.2 $\pm$ 5.5   |                  |       |
|     | Inferior                    | 90.5 $\pm$ 6.4              | 97.2 $\pm$ 4.6   | 96.7 $\pm$ 6.1   | 96.7 $\pm$ 5.2   | 97.6 $\pm$ 4.6   | 97.8 $\pm$ 5.4   | 94.4 $\pm$ 5.9   | 100.3 $\pm$ 4.9  | NA              | 96.9 $\pm$ 5.3   |                  |       |
|     | Average RNFL, $\mu\text{m}$ | NA                          | 107.6 $\pm$ 13.0 | 108.6 $\pm$ 11.0 | 106.8 $\pm$ 8.3  | 107.6 $\pm$ 9.6  | 107.6 $\pm$ 9.6  | 109.0 $\pm$ 11.1 | 112.5 $\pm$ 6.4  | 110 (N = 1)     | 108.1 $\pm$ 9.2  |                  |       |
| OS  | Superior                    | NA                          | 109.2 $\pm$ 14.0 | 112.3 $\pm$ 12.0 | 107.8 $\pm$ 10.0 | 108.3 $\pm$ 10.4 | 111.2 $\pm$ 11.0 | 111.3 $\pm$ 7.5  | 113 $\pm$ 7.1    | 111 (N = 1)     | 109.3 $\pm$ 10.4 |                  |       |
|     | Inferior                    | NA                          | 106.8 $\pm$ 13.2 | 105.1 $\pm$ 10.7 | 106.0 $\pm$ 8.3  | 106.9 $\pm$ 9.6  | 110.5 $\pm$ 10.2 | 106.7 $\pm$ 16.5 | 112 $\pm$ 4.2    | 109 (N = 1)     | 106.9 $\pm$ 9.5  |                  |       |
|     | Nasal                       | NA                          | 84.0 $\pm$ 10.2  | 88.2 $\pm$ 16.3  | 85.9 $\pm$ 14.3  | 86.5 $\pm$ 16.7  | 91.3 $\pm$ 26.4  | 86.7 $\pm$ 10.7  | 93.0 $\pm$ 19.8  | 86 (N = 1)      | 87.2 $\pm$ 16.6  |                  |       |
| OS  | Temporal                    | NA                          | 73.6 $\pm$ 6.3   | 78.6 $\pm$ 9.2   | 79.4 $\pm$ 10.2  | 78.9 $\pm$ 12.4  | 85.1 $\pm$ 23.7  | 85.0 $\pm$ 13.5  | 75.5 $\pm$ 9.2   | 84 (N = 1)      | 79.8 $\pm$ 13.0  |                  |       |
|     | Average GCC, $\mu\text{m}$  | NA                          | 100.1 $\pm$ 6.4  | 97.2 $\pm$ 5.9   | 98.8 $\pm$ 6.5   | 100.3 $\pm$ 6.4  | 99.4 $\pm$ 7.1   | 99.3 $\pm$ 6.4   | 104 (N = 1)      | 97 (N = 1)      | 99.3 $\pm$ 6.2   |                  |       |
|     | Superior                    | NA                          | 99.3 $\pm$ 6.6   | 96.3 $\pm$ 6.9   | 97.4 $\pm$ 6.3   | 98.9 $\pm$ 6.3   | 98.8 $\pm$ 7.6   | 98.3 $\pm$ 5.0   | 102 (N = 1)      | 96 (N = 1)      | 98.1 $\pm$ 6.4   |                  |       |
| OS  | Inferior                    | NA                          | 102.0 $\pm$ 5.8  | 98.1 $\pm$ 6.1   | 100.0 $\pm$ 7.5  | 101.6 $\pm$ 5.7  | 101.1 $\pm$ 6.6  | 100.3 $\pm$ 8.3  | 106 (N = 1)      | 99 (N = 1)      | 100.6 $\pm$ 6.5  |                  |       |
|     | Average RNFL, $\mu\text{m}$ | NA                          | 104.3 $\pm$ 9.3  | 106.8 $\pm$ 9.7  | 106.7 $\pm$ 11.0 | 110.1 $\pm$ 10.9 | 112.5 $\pm$ 9.1  | 110.0 $\pm$ 9.8  | 114 $\pm$ 0      | 112 (N = 1)     | 108.5 $\pm$ 10.4 |                  |       |
|     | Superior                    | NA                          | 106.5 $\pm$ 9.7  | 110.6 $\pm$ 11.7 | 109.4 $\pm$ 11.2 | 112.3 $\pm$ 11.2 | 116.5 $\pm$ 8.0  | 114.0 $\pm$ 15.1 | 118.5 $\pm$ 0.7  | 119 (N = 1)     | 111.4 $\pm$ 11.4 |                  |       |
| OS  | Inferior                    | NA                          | 101.8 $\pm$ 9.7  | 103.1 $\pm$ 11.7 | 104.1 $\pm$ 11.2 | 107.7 $\pm$ 11.2 | 108.5 $\pm$ 8.0  | 106.0 $\pm$ 15.1 | 110.5 $\pm$ 0.7  | 106 (N = 1)     | 105.6 $\pm$ 10.8 |                  |       |
|     | Nasal                       | NA                          | 77.5 $\pm$ 9.8   | 80.6 $\pm$ 16.6  | 83.7 $\pm$ 11.3  | 89.9 $\pm$ 15.3  | 86.9 $\pm$ 9.0   | 87.0 $\pm$ 12.3  | 87.0 $\pm$ 21.2  | 82 (N = 1)      | 85.4 $\pm$ 13.2  |                  |       |
|     | Temporal                    | NA                          | 74.3 $\pm$ 9.3   | 76.3 $\pm$ 16.3  | 78.8 $\pm$ 8.2   | 12.4 $\pm$ 7.8   | 77.9 $\pm$ 13.5  | 76.0 $\pm$ 9.9   | 79.5 $\pm$ 3.5   | 84 (N = 1)      | 77.2 $\pm$ 9.9   |                  |       |
| OS  | Average GCC, $\mu\text{m}$  | NA                          | 98.5 $\pm$ 6.7   | 99.4 $\pm$ 6.1   | 99.6 $\pm$ 6.0   | 100.3 $\pm$ 6.5  | 98.6 $\pm$ 7.3   | 103.7 $\pm$ 9.0  | 103 (N = 1)      | 96 (N = 1)      | 99.7 $\pm$ 6.3   |                  |       |
|     | Superior                    | NA                          | 98.0 $\pm$ 7.0   | 100.1 $\pm$ 6.4  | 99.9 $\pm$ 6.2   | 99.8 $\pm$ 5.8   | 98.8 $\pm$ 7.3   | 103.0 $\pm$ 9.1  | 103 (N = 1)      | 99 (N = 1)      | 99.7 $\pm$ 6.7   |                  |       |

(continued)

SUPPLEMENTAL TABLE 1  
Continued

|                 |                  | Age, years  |              |              |              |              |              |              |              |             |              | Total |
|-----------------|------------------|-------------|--------------|--------------|--------------|--------------|--------------|--------------|--------------|-------------|--------------|-------|
|                 |                  | 3           | 4            | 5            | 6            | 7            | 8            | 9            | 10           | 11          | Total        |       |
| Male            | Inferior         | NA          | 98.0 ± 7.0   | 99.0 ± 6.4   | 99.3 ± 6.2   | 100.3 ± 5.8  | 98.4 ± 7.3   | 104.3 ± 9.1  | 103 (N = 1)  | 93 (N = 1)  | 99.5 ± 6.3   |       |
|                 | Average RNFL, μm | NA          | 112.8 ± 10.8 | 106.1 ± 13.4 | 107.0 ± 8.2  | 107.4 ± 12.6 | 107.6 ± 10.4 | 102.3 ± 7.6  | 107.0 ± 8.5  | 110 (N = 1) | 107.2 ± 10.3 |       |
|                 | Superior         | NA          | 115.8 ± 10.7 | 108.9 ± 18.3 | 107.5 ± 10.0 | 108.1 ± 14.3 | 106.8 ± 11.6 | 110.0 ± 7.9  | 113.5 ± 9.2  | 111 (N = 1) | 108.6 ± 12.3 |       |
|                 | Inferior         | NA          | 110.3 ± 12.7 | 103.7 ± 9.9  | 106.4 ± 8.9  | 107.9 ± 12.4 | 108.1 ± 11.1 | 94.7 ± 8.1   | 101.5 ± 7.8  | 109 (N = 1) | 106.2 ± 10.4 |       |
|                 | Nasal            | NA          | 90.5 ± 5.4   | 88.5 ± 18.2  | 86.0 ± 11.5  | 88.4 ± 20.0  | 86.5 ± 14.3  | 74.7 ± 7.5   | 100.5 ± 27.6 | 86 (N = 1)  | 87.3 ± 15.3  |       |
|                 | Temporal         | NA          | 70.8 ± 11.3  | 77.1 ± 6.6   | 78.2 ± 7.4   | 75.5 ± 14.6  | 78.1 ± 15.0  | 78.5 ± 12.0  | 71.0 ± 11.3  | 84 (N = 1)  | 76.6 ± 11.1  |       |
|                 | Average GCC, μm  | 99 (N = 1)  | 99.9 ± 6.4   | 94.3 ± 9.3   | 99.7 ± 5.9   | 97.9 ± 6.0   | 98.2 ± 6.0   | 92.3 ± 1.5   | 97.0 ± 2.8   | 97 (N = 1)  | 98.1 ± 6.6   |       |
|                 | Superior         | 101 (N = 1) | 99.0 ± 6.9   | 93.9 ± 9.3   | 99.2 ± 6.2   | 97.1 ± 6.3   | 97.9 ± 6.0   | 93.0 ± 1.0   | 97.0 ± 4.2   | 96 (N = 1)  | 97.5 ± 6.8   |       |
|                 | Inferior         | 96 (N = 1)  | 101.7 ± 6.5  | 94.6 ± 9.9   | 100.3 ± 7.1  | 98.4 ± 6.0   | 98.5 ± 6.2   | 93.0 ± 2.8   | 96.5 ± 2.1   | 99 (N = 1)  | 98.7 ± 7.2   |       |
|                 | Average RNFL, μm | NA          | 109.0 ± 12.7 | 107.7 ± 11.1 | 105.7 ± 13.4 | 110.3 ± 11.4 | 107.4 ± 16.7 | 104.0 ± 7.2  | 109.5 ± 7.8  | 112 (N = 1) | 107.5 ± 11.5 |       |
|                 | Superior         | NA          | 110.5 ± 12.0 | 111.4 ± 9.9  | 108.5 ± 13.2 | 113.2 ± 12.5 | 108.3 ± 9.4  | 111.0 ± 12.4 | 112.0 ± 8.5  | 119 (N = 1) | 110.4 ± 12.9 |       |
|                 | Inferior         | NA          | 107.5 ± 12.0 | 104.0 ± 9.9  | 103.2 ± 13.2 | 106.9 ± 12.5 | 106.6 ± 9.4  | 96.7 ± 12.4  | 107.0 ± 8.5  | 106 (N = 1) | 104.7 ± 11.6 |       |
|                 | Nasal            | NA          | 83.5 ± 9.2   | 79.2 ± 18.8  | 84.1 ± 11.8  | 87.6 ± 16.7  | 88.8 ± 18.4  | 78.3 ± 5.5   | 86.5 ± 9.2   | 82 (N = 1)  | 84.9 ± 14.4  |       |
|                 | Temporal         | NA          | 78.5 ± 4.9   | 82.5 ± 15.4  | 79.6 ± 11.7  | 76.1 ± 10.4  | 72.2 ± 13.8  | 79.0 ± 14.0  | 80.0 ± 4.2   | 84 (N = 1)  | 77.8 ± 11.9  |       |
| Average GCC, μm | NA               | 96.5 ± 7.7  | 96.8 ± 4.8   | 99.5 ± 6.1   | 98.0 ± 6.1   | 97.6 ± 5.6   | 92.3 ± 2.3   | 97.5 ± 0.7   | 96 (N = 1)   | 98.0 ± 5.8  |              |       |
| Superior        | NA               | 95.5 ± 7.5  | 97.1 ± 4.8   | 99.6 ± 6.2   | 97.4 ± 5.5   | 97.8 ± 5.6   | 92.7 ± 4.5   | 97.5 ± 0.7   | 99 (N = 1)   | 98.0 ± 6.4  |              |       |
| Inferior        | NA               | 96.8 ± 7.5  | 96.7 ± 4.8   | 99.3 ± 6.2   | 98.2 ± 5.5   | 97.4 ± 5.6   | 91.7 ± 4.5   | 97.5 ± 0.7   | 93 (N = 1)   | 97.9 ± 5.7  |              |       |
| Female          | Average RNFL, μm | NA          | 105.7 ± 14.4 | 110.6 ± 13.1 | 107.0 ± 8.8  | 109.4 ± 8.9  | 109.8 ± 11.3 | 110.0 ± 7.1  | 114.7 ± 5.9  | NA          | 109.0 ± 9.9  |       |
|                 | Superior         | NA          | 110.3 ± 20.8 | 110.2 ± 13.3 | 109.1 ± 11.0 | 112.1 ± 11.3 | 111.2 ± 13.1 | 111.8 ± 6.3  | 115.3 ± 6.4  | NA          | 110.8 ± 11.6 |       |
|                 | Inferior         | NA          | 101.7 ± 8.3  | 110.8 ± 14.7 | 105.4 ± 8.0  | 106.7 ± 8.2  | 108.3 ± 11.4 | 108.2 ± 9.5  | 114.3 ± 5.0  | NA          | 107.3 ± 9.8  |       |
|                 | Nasal            | NA          | 87.7 ± 23.1  | 85.0 ± 10.8  | 82.7 ± 15.8  | 86.1 ± 15.6  | 84.7 ± 22.7  | 84.0 ± 9.8   | 93.7 ± 14.0  | NA          | 84.9 ± 16.8  |       |
|                 | Temporal         | NA          | 72.0 ± 2.6   | 81.4 ± 10.7  | 81.7 ± 13.2  | 79.9 ± 11.2  | 86.7 ± 19.4  | 88.5 ± 9.5   | 76.0 ± 6.6   | NA          | 82.2 ± 13.8  |       |
|                 | Average GCC, μm  | 88.5 ± 3.5  | 95.8 ± 6.1   | 96.8 ± 8.1   | 97.0 ± 5.5   | 99.3 ± 5.6   | 99.1 ± 6.5   | 99.3 ± 5.6   | 103.0 ± 1.4  | NA          | 97.9 ± 6.4   |       |
|                 | Superior         | 90.5 ± 2.1  | 95.7 ± 6.3   | 95.9 ± 8.4   | 95.6 ± 5.5   | 98.2 ± 5.7   | 98.9 ± 7.2   | 98.4 ± 5.8   | 101.5 ± 0.7  | NA          | 97.1 ± 6.6   |       |
|                 | Inferior         | 86.0 ± 4.2  | 95.8 ± 6.2   | 96.9 ± 7.9   | 96.9 ± 6.4   | 100.9 ± 5.7  | 99.8 ± 6.0   | 100.6 ± 5.7  | 105.0 ± 1.4  | NA          | 98.5 ± 6.7   |       |
|                 | Average RNFL, μm | 114 (N = 1) | 99.5 ± 2.1   | 110.1 ± 9.1  | 108.5 ± 7.5  | 110.1 ± 10.1 | 109.4 ± 9.3  | 107.6 ± 9.6  | 111.7 ± 4.0  | NA          | 109.2 ± 8.7  |       |
|                 | Superior         | 114 (N = 1) | 102.5 ± 2.8  | 113.6 ± 11.5 | 111.0 ± 7.3  | 113.1 ± 10.9 | 112.7 ± 8.0  | 107.2 ± 7.6  | 118.3 ± 7.8  | NA          | 112.1 ± 10.5 |       |
|                 | Inferior         | 115 (N = 1) | 96.0 ± 2.8   | 107.4 ± 11.5 | 106.0 ± 7.3  | 107.0 ± 10.9 | 106.0 ± 8.0  | 108.2 ± 7.6  | 106.0 ± 7.8  | NA          | 106 ± 9.0    |       |
|                 | Nasal            | 70 (N = 1)  | 71.5 ± 7.8   | 90.5 ± 20.1  | 82.4 ± 11.5  | 87.2 ± 13.4  | 81.5 ± 12.6  | 82.0 ± 11.3  | 83.0 ± 16.5  | NA          | 84.1 ± 13.8  |       |
|                 | Temporal         | 79 (N = 1)  | 70.0 ± 12.7  | 70.8 ± 14.9  | 77.2 ± 7.4   | 74.7 ± 6.5   | 79.3 ± 8.9   | 75.8 ± 6.6   | 79.3 ± 2.5   | NA          | 75.8 ± 9.0   |       |
|                 | Average GCC, μm  | 90.0 ± 4.2  | 98.0 ± 3.7   | 98.4 ± 6.6   | 97.3 ± 5.8   | 100.2 ± 5.7  | 99.0 ± 6.5   | 99.6 ± 7.9   | 104.5 ± 2.1  | NA          | 98.7 ± 6.2   |       |
| Superior        | 89.0 ± 6.4       | 97.8 ± 4.6  | 98.8 ± 7.1   | 97.7 ± 5.6   | 100.3 ± 5.4  | 99.3 ± 6.6   | 99.0 ± 8.1   | 105.0 ± 2.1  | NA           | 98.8 ± 6.3  |              |       |
| Inferior        | 90.5 ± 6.4       | 98.0 ± 4.6  | 98.3 ± 7.1   | 97.1 ± 5.6   | 100.0 ± 5.4  | 98.4 ± 6.6   | 99.9 ± 8.1   | 104.5 ± 2.1  | NA           | 98.5 ± 6.2  |              |       |

GCC = ganglion cell complex; OD = Oculus Dexter (right eye); OS = Oculus Sinister (left eye); NA = not applicable; RNFL = retinal nerve fiber layer.
